# Supplementary material for: Dioxygen-triggered oxidation of benzylic C–H bonds: insight on the synergistic effect of Cu–Fe bimetallic oxide
Source: Royal Society of Chemistry journal article supplement (doi:10.1039/d3re00116d), 2023-01-01

## Supplementary Information

# Dioxygen-Triggered Oxidation of Benzylic C-H Bonds: Insight of the Synergistic Effect of Cu-Fe Bimetallic Oxide

Aniruddha Singha,<sup>a</sup> Anil Chandra Kothari,<sup>b, c</sup> Rajaram Bal,<sup>b</sup> Biswajit Chowdhury<sup>\*a</sup>

<sup>a</sup> Green Chemistry and Nanomaterials Laboratory, Department of Chemistry and Chemical Biology, Indian Institute of Technology (Indian School of Mines), Dhanbad, Jharkhand – 826004, India

<sup>b</sup> Light Stock Processing Division, CSIR-Indian Institute of Petroleum, Dehradun 248005, Uttarakhand, India

<sup>c</sup> Academy of Scientific and Innovative Research (AcSIR), Ghaziabad, 201002, India

\* *Corresponding author. Email: [biswajit72@iitism.ac.in](mailto:biswajit72@iitism.ac.in); Phone: (+91)-326-2235663; Fax: (+91)-326-2296563; ORCID ID: 0000-0003-3257-2065*

**Table S1.** Comparison of lattice parameters of  $\text{Fe}_2\text{O}_3$  in different catalysts.

| Sl. No. | Material                       | a=b (Å) | c (Å)    | JCPDS |       | Error (%) |         |
|---------|--------------------------------|---------|----------|-------|-------|-----------|---------|
|         |                                |         |          | a (Å) | c (Å) | a         | c       |
| 1       | $\alpha\text{-Fe}_2\text{O}_3$ | 5.02119 | 13.73262 | 5.028 | 13.73 | 0.13544   | -0.0191 |
| 2       | $\text{Cu}_1\text{Fe}_2$       | 5.02462 | 13.73622 | 5.028 | 13.73 | 0.06722   | -0.0453 |

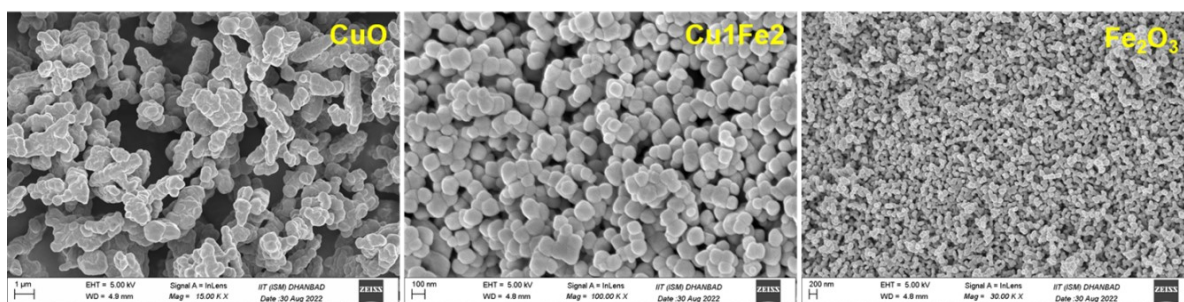

**Fig. S1** FESEM images of as-synthesized catalysts.

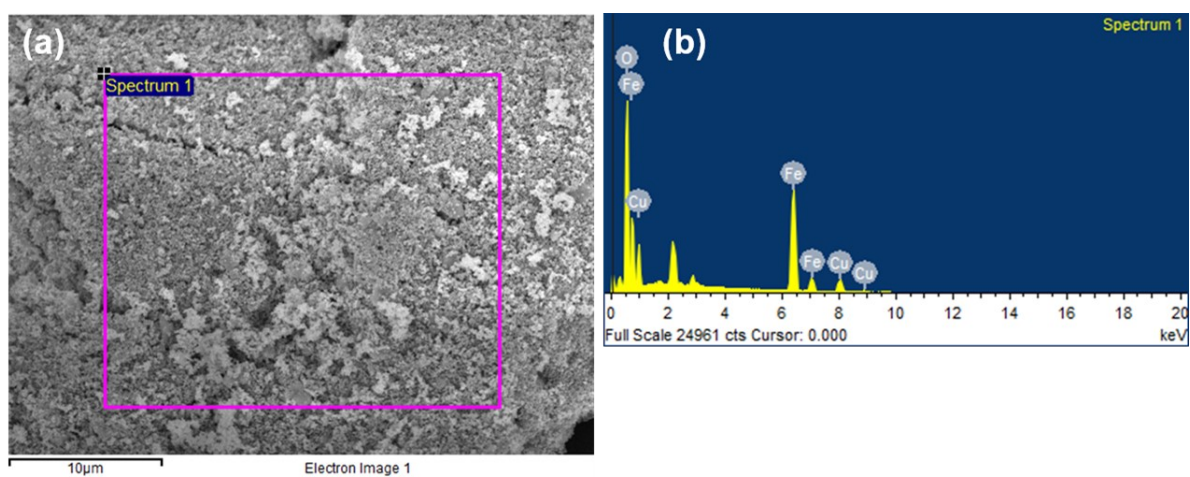

**Fig. S2** Energy Dispersive X-ray Analysis (EDAX) for the elemental analysis of the Cu<sub>1</sub>Fe<sub>2</sub> catalyst.

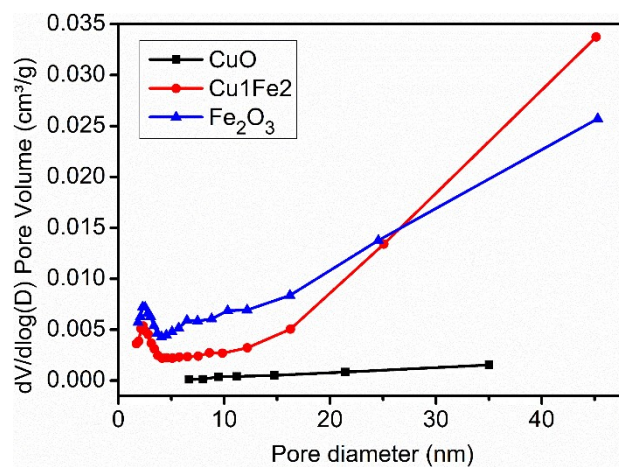

**Fig. S3** BJH pore size distribution of the catalysts.

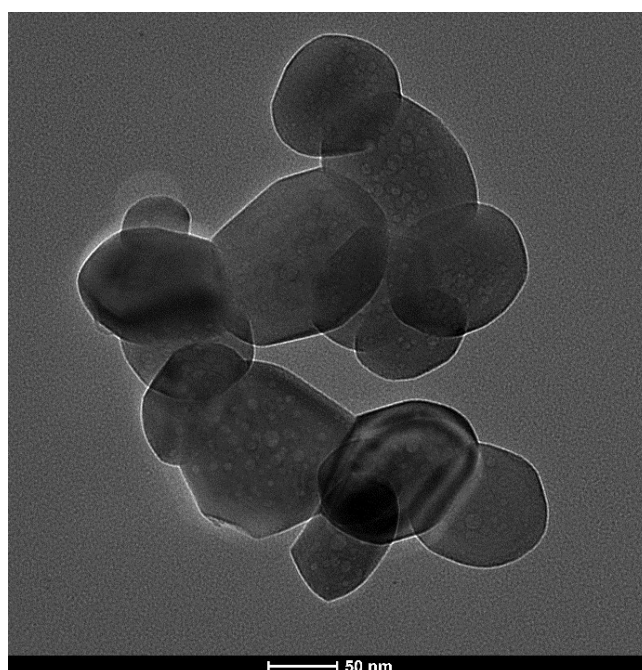

**Fig. S4** TEM image of Fe<sub>2</sub>O<sub>3</sub>.

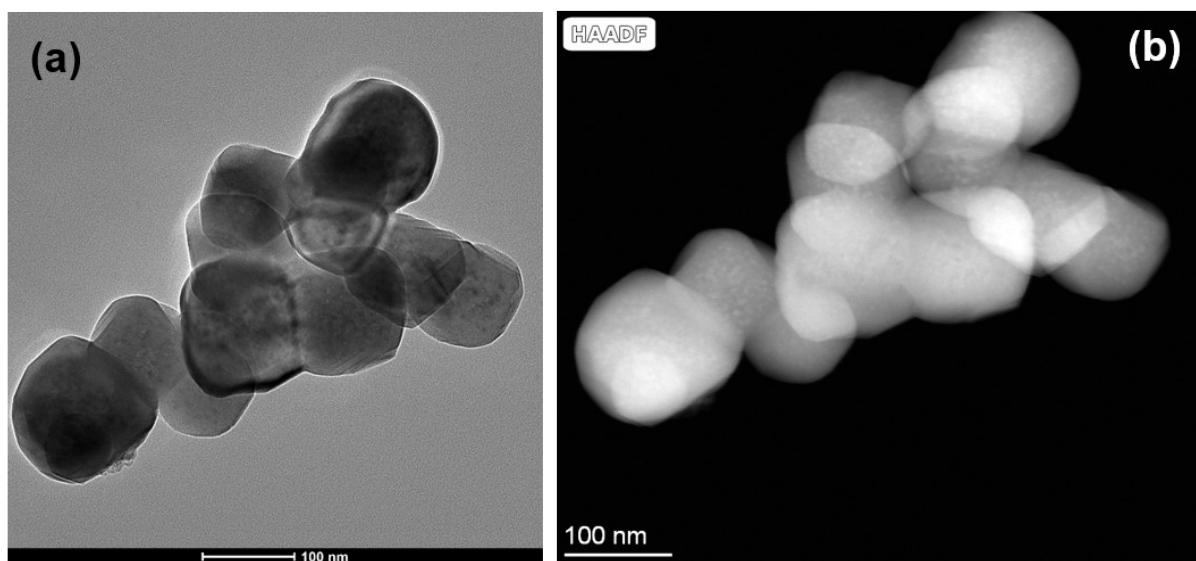

**Fig. S5** (a) TEM image, (b) high-angle annular dark field (HAADF) image of as-synthesized  $\text{Cu}_1\text{Fe}_2$  catalyst.

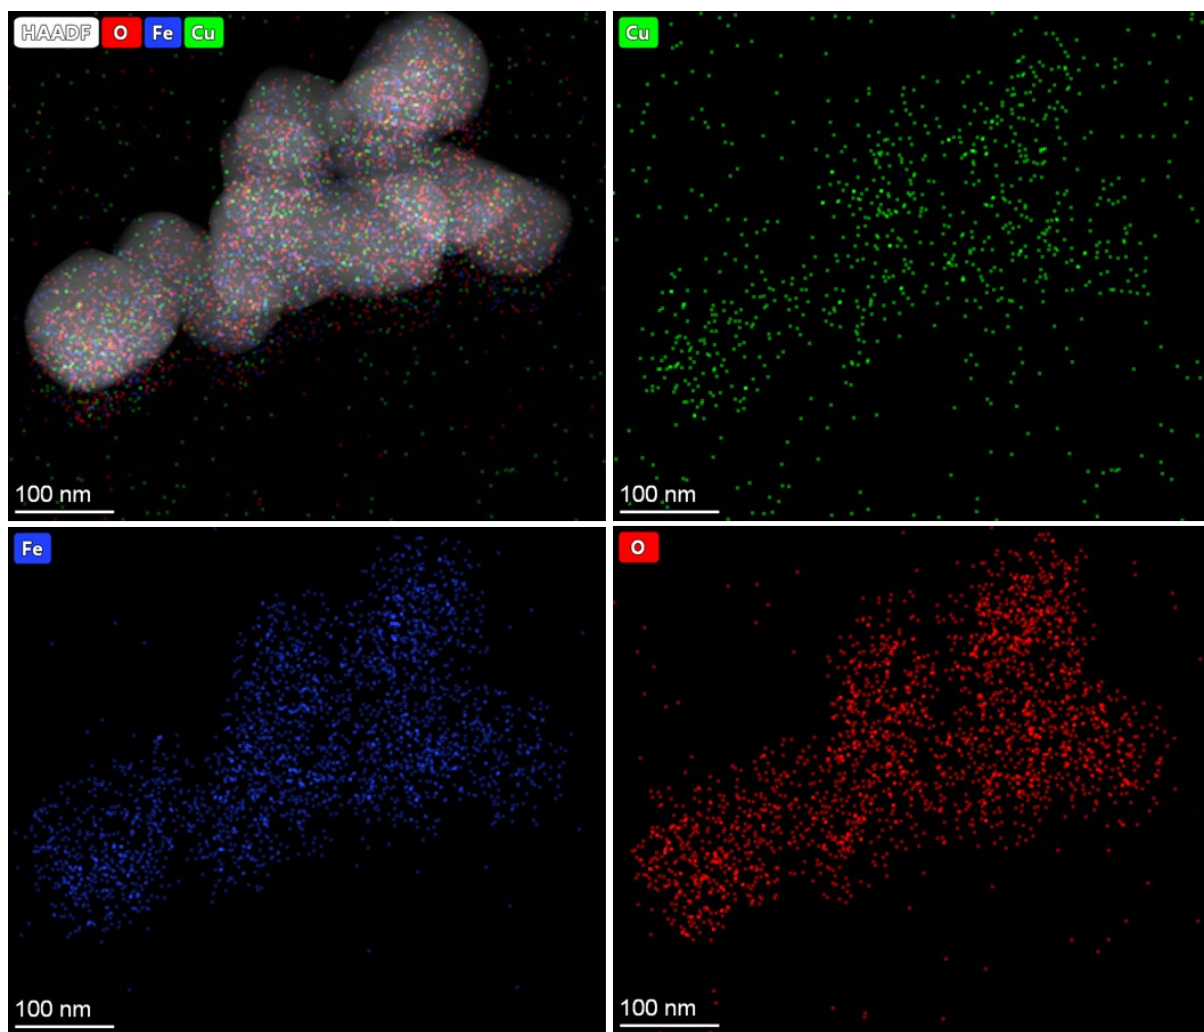

**Fig. S6** TEM-EDS mapping images of as-synthesized  $\text{Cu}_1\text{Fe}_2$  catalys

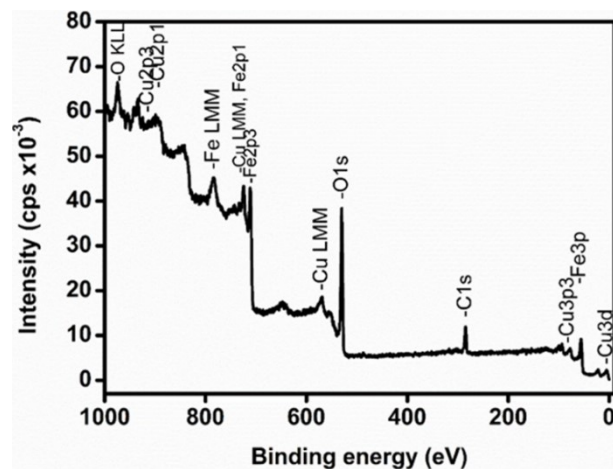

**Fig. S7** XPS spectra of (a) Cu 2p and (b) O 1s of CuO.

**Table S2.** The relative atomic concentration (%) of Cu, Fe and O and their binding energies estimated from XPS data.

| Catalyst                       | iron (%)         |                                             |                                              |                | copper (%)      |                                             |                                           |             |             | oxygen (%)      |                 |                  |
|--------------------------------|------------------|---------------------------------------------|----------------------------------------------|----------------|-----------------|---------------------------------------------|-------------------------------------------|-------------|-------------|-----------------|-----------------|------------------|
|                                | Fe <sup>2+</sup> | Fe <sup>3+</sup> <sub>octa</sub><br>(2p3/2) | Fe <sup>3+</sup> <sub>tetra</sub><br>(2p3/2) | satellite      | Cu <sup>+</sup> | Cu <sup>2+</sup> <sub>octa</sub><br>(2p3/2) | Cu <sup>2+</sup> <sub>tetra</sub> (2p3/2) | satellite1  | satellite2  | O <sub>L</sub>  | O <sub>V</sub>  | O <sub>ads</sub> |
| Fe <sub>2</sub> O <sub>3</sub> | -                | 10.5<br>(710.2)                             | 7.8<br>(712.4)                               | 3.2<br>(719.0) | -               | -                                           | -                                         | -           | -           | 6.1<br>(529.2)  | 19.8<br>(531.1) | 9.1<br>(532.7)   |
| Cu1Fe2-<br>fresh               | 0.5<br>(708.3)   | 16.8<br>(710.3)                             | 6.3<br>(712.6)                               | 4.8<br>(718.5) | 0.8<br>(931.7)  | 2.6<br>(933.4)                              | 1.0 (935.7)                               | 1.2 (940.3) | 1.1 (943.2) | 14.7<br>(528.5) | 34.8<br>(530.2) | 6.5<br>(532.1)   |
| Cu1Fe2-<br>spent               | 1.9<br>(707.4)   | 11.2<br>(710.4)                             | 4.2<br>(712.8)                               | 4.6<br>(719.0) | 0.6<br>(931.6)  | 4.0<br>(932.9)                              | 0.4 (936.2)                               | 1.3 (939.4) | 1.3 (942.3) | 12.6<br>(528.3) | 29.2<br>(530.0) | 5.8<br>(532.0)   |
| CuO                            | -                | -                                           | -                                            | -              | 0.7<br>(932.4)  | 6.8<br>(933.5)                              | 1.7 (935.7)                               | 3.1 (941.3) | 1.3 (943.8) | 9.8<br>(529.4)  | 12.7<br>(531.5) | 4.1<br>(533.4)   |

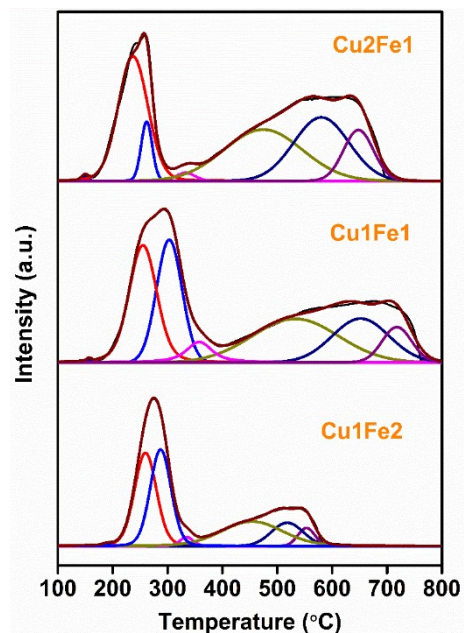

**Fig. S8** H<sub>2</sub>-TPR profiles of the as-synthesized catalyst

**Table S3.** The deconvoluted TPR results of the catalysts.

| Catalyst | Quantity (cm <sup>3</sup> /g STP)* |                |                 |                     |                                                                 |                                      |                |
|----------|------------------------------------|----------------|-----------------|---------------------|-----------------------------------------------------------------|--------------------------------------|----------------|
|          | Dispersed CuO<br>→ Cu              | Cu(II) → Cu(I) | Cu(I) → Cu      | CuO (agglomeration) | Fe <sub>2</sub> O <sub>3</sub> → Fe <sub>3</sub> O <sub>4</sub> | Fe <sub>3</sub> O <sub>4</sub> → FeO | FeO → Fe       |
| CuO      | -                                  | 6.086 (280 °C) | 19.041 (309 °C) | 2.042 (385 °C)      |                                                                 |                                      |                |
| Cu1Fe2   | 0.045 (184 °C)                     | 8.289 (260 °C) | 7.987 (287 °C)  | 0.527 (335 °C)      | 4.027 (454 °C)                                                  | 1.850 (518 °C)                       | 0.764 (553 °C) |
| Cu1Fe1   | 0.023 (157 °C)                     | 6.265 (255 °C) | 5.518 (303 °C)  | 1.284 (357 °C)      | 6.025 (535 °C)                                                  | 3.991 (653 °C)                       | 1.677 (718 °C) |
| Cu2Fe1   | 0.065 (149 °C)                     | 7.612 (236 °C) | 1.317 (261 °C)  | 0.312 (332 °C)      | 8.363 (473 °C)                                                  | 7.266 (580 °C)                       | 3.175 (647 °C) |

\* The temperature in bracket represents reduction temperature

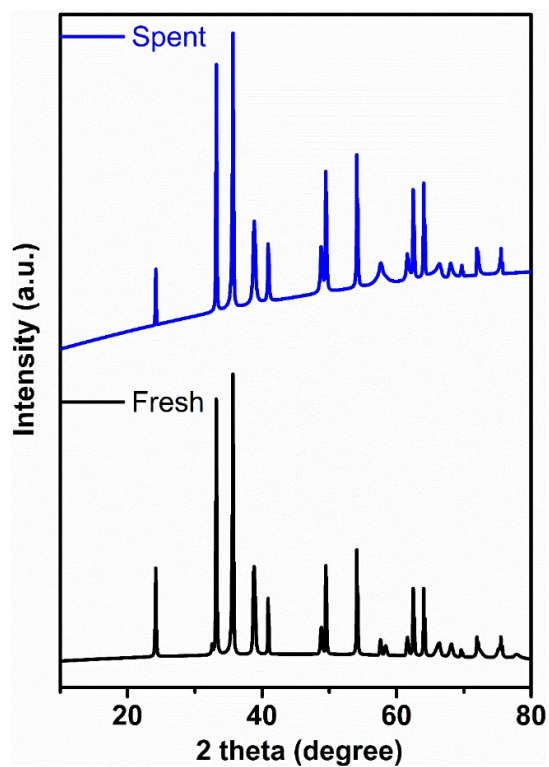

**Fig. S9** XRD pattern of spent and fresh Cu<sub>1</sub>Fe<sub>2</sub> catalysts.

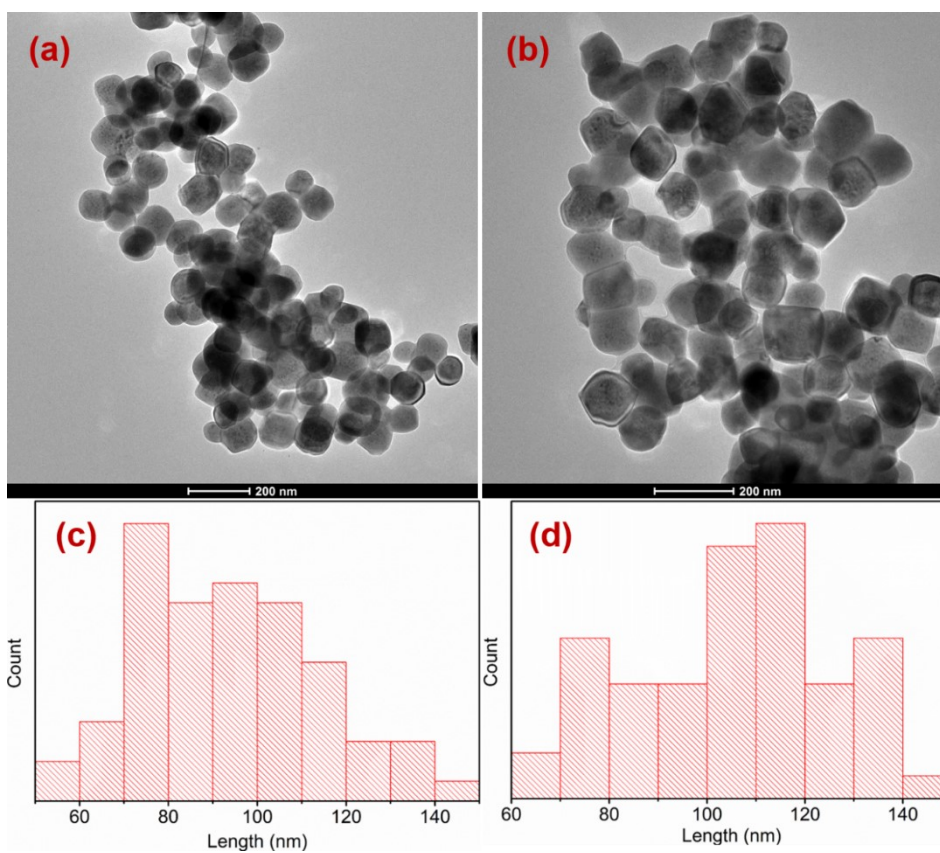

**Fig. S10** TEM images of (a) fresh and (b) spent Cu<sub>1</sub>Fe<sub>2</sub>; particle size distribution of (c) fresh and (d) spent Cu<sub>1</sub>Fe<sub>2</sub> catalysts.



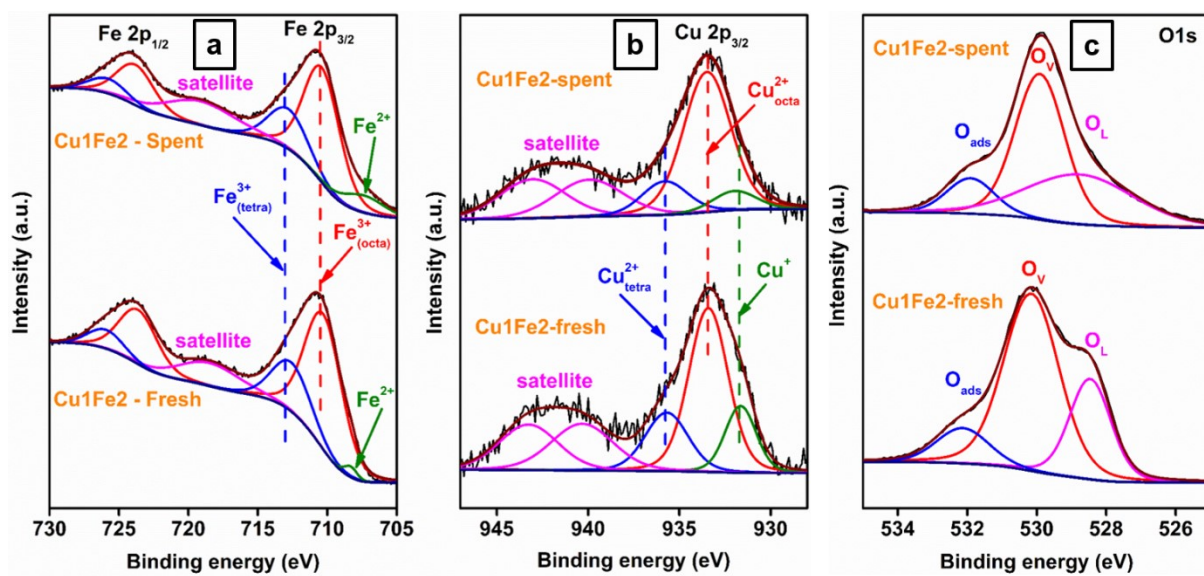

**Fig. S11** (a) Fe2p, (b) Cu2p, and (c) O1s XPS profiles of fresh and spent catalyst.

**Calculation of ethylbenzene conversion:** Analysis of the catalytic reactions was carried out by gas chromatography using an Agilent 7890B series gas chromatograph system.

Conversion and product yields were estimated using anisole as an internal standard (IS).

Firstly, the response factor (RF) of the analyte was determined with respect to the internal standard (IS).

Response factors were estimated using the following equation:

$$RF = \frac{\text{Area of IS} \times \text{Concentration of analyte}}{\text{Area of analyte} \times \text{Concentration of IS}}$$

The concentration of reactant and products were calculated using the following equation:

$$\text{Concentration of analyte} = \frac{RF \times \text{Concentration of IS} \times \text{Area of analyte}}{\text{Area of IS}}$$

Conversion of the analyte was calculated using the following equation:

$$\text{Conversion (\%)} = \frac{(\text{Initial concentration} - \text{Final concentration})}{\text{Initial concentration}} \times 100 \%$$

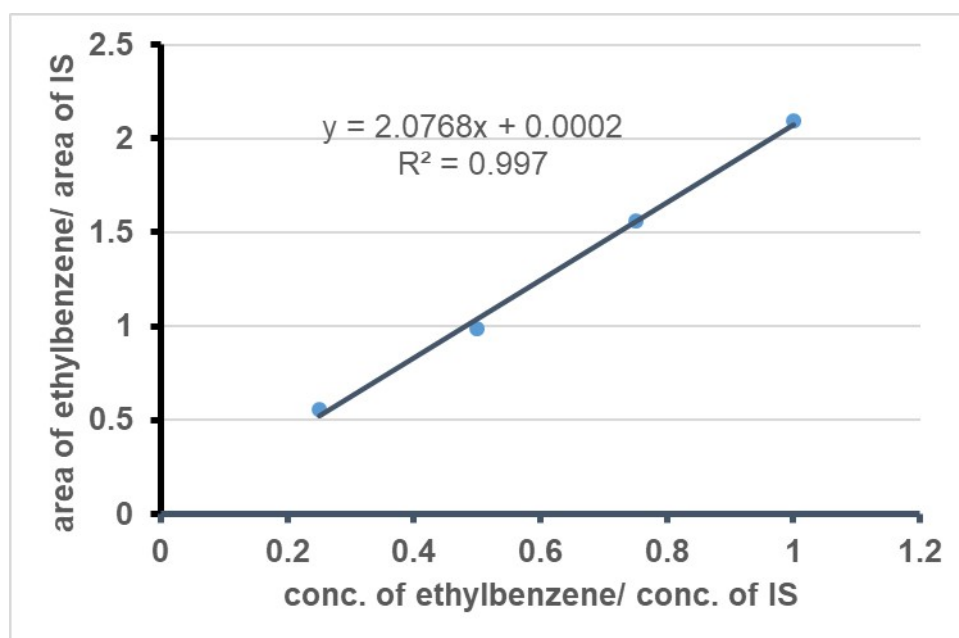

Supplement: d3re00116d1.pdf [file d3re00116d1.pdf]
